# Supplementary material for: Efficient N 2 O 5 Uptake and NO 3 Oxidation in the Outflow of Urban Beijing
Source: Copernicus journal article supplement (doi:10.5194/acp-2018-88), 2018-02-09
Supplement: Supplementary file 1 [file acp-2018-88-supplement.pdf]

1 ***Support Information for***

2

3 **Efficient N<sub>2</sub>O<sub>5</sub> Uptake and NO<sub>3</sub> Oxidation in the Outflow of Urban Beijing**

4 Haichao Wang<sup>1</sup>, Keding Lu<sup>1\*</sup>, Song Guo<sup>1</sup>, Zhijun Wu<sup>1</sup>, Dongjie Shang<sup>1</sup>, Zhaofeng Tan<sup>1</sup>, Yujue Wang<sup>1</sup>,  
5 Michael Le Breton<sup>2</sup>, Mingjin Tang<sup>3</sup>, Yusheng Wu<sup>1</sup>, Jing Zheng<sup>1</sup>, Limin Zeng<sup>1</sup>, Mattias Hallquist<sup>2</sup>, Min  
6 Hu<sup>1</sup> and Yuanhang Zhang<sup>1,4</sup>

7

8 <sup>1</sup>State Key Joint Laboratory of Environmental Simulation and Pollution Control, College of  
9 Environmental Sciences and Engineering, Peking University, Beijing, China.

10 <sup>2</sup>Department of Chemistry and Molecular Biology, University of Gothenburg, Gothenburg, Sweden

11 <sup>3</sup>State Key Laboratory of Organic Geochemistry and Guangdong Key Laboratory of Environmental  
12 Protection and Resources Utilization, Guangzhou Institute of Geochemistry, Chinese Academy of  
13 Sciences, Guangzhou 510640, China

14 <sup>4</sup>CAS Center for Excellence in Regional Atmospheric Environment, Chinese Academy of Sciences,  
15 Xiamen, China

16

17 \*Corresponding to: Keding Lu ([k.lu@pku.edu.cn](mailto:k.lu@pku.edu.cn))

18

19 **List of the supplement information:**

20 **Test S1.** Correction of nighttime NO<sub>2</sub> concentration

21 **Figure S1.** Correction factor of nighttime NO<sub>2</sub> in Changping site.

22 **Figure S2.** The steady state lifetime estimation of NO<sub>3</sub> and N<sub>2</sub>O<sub>5</sub> based on the box model.

23 **Figure S3.** The time series of N<sub>2</sub>O<sub>5</sub> lifetime calculated by steady state method

24 **Figure S4.** Dependence of N<sub>2</sub>O<sub>5</sub> lifetime on relative humidity.

25 **Table S1.** The statistical results of the relevant parameters during the nighttime .

26 **Table S2.** List of the total yield of ClNO<sub>2</sub> ( $\gamma \times f$ ) in this campaign.

27 **Table S3.** List of the observed ClNO<sub>2</sub>/N<sub>2</sub>O<sub>5</sub>

28 **Text S1: Correction of NO<sub>2</sub> concentration.**

29 During the 2014 Wangdu campaign (Tan et al., 2017), we used two Thermo Electron model 42i NO-  
30 NO<sub>2</sub>-NO<sub>x</sub> analyzers to measure NO<sub>2</sub>, one is PKU-PL equipped with a home-built photolytic converter,  
31 the other is equipped with a catalytic converter (PKU-Mo), the later one was used in this campaign.  
32 As the Figure S1(a) shows that the ratio of NO<sub>2</sub> measured by PKU-PL to that measured by PKU-Mo  
33 had clear diurnal profiles (in fact, the NO<sub>2</sub> ratio is a correction factor, here specifically defined as WD  
34 PL/Mo), which is about 0.75 and has small variation at nighttime, and drops to ~0.4 at noon.  
35 Additionally, based on the photo-stationary state method we calculated NO<sub>2</sub> (here defined as WD Cal)  
36 values by measured NO and  $j(\text{NO}_2)$  according to Eq. (S1):

37 
$$[\text{NO}_2] = \frac{k_1[\text{NO}][\text{O}_3]}{j(\text{NO}_2)} \quad \text{Eq. (S1)}$$

38 Here the  $k_1$  is the reaction rate constant of NO with O<sub>3</sub>. The WD Cal/Mo ratio keep reasonably  
39 consistent with the WD PL/Mo during the daytime.

40 Wangdu site is a semi-rural site in North China Plain and similar with the Changping site. Figure  
41 S1(b) shows the profiles of the variation and mixing ratios of O<sub>3</sub> in the two sites keep highly consistent.  
42 The ratio of the calculated NO<sub>2</sub> by the photo-stationary state method to PKU-Mo in Changping site  
43 also is the same tendency with that in Wangdu. For correcting the nighttime NO<sub>2</sub>, we assumed that the  
44 NO<sub>2</sub> ratio of Changping is the same variation with that in Wangdu, and the calculated NO<sub>2</sub> by the  
45 photo-stationary state method is reliable. Then scaled the diurnal profile of WD PL/Mo with an offset  
46 to make the daytime ratio has the best fit with the daytime CP Cal/Mo (shown in the red line), here  
47 defined as CP PL/Mo (scaled by WD). After scaling, the nocturnal CP PL/Mo is an extended correction  
48 factor for the measured NO<sub>2</sub> by PKU-Mo. The nighttime correction factor is about 0.6 and was stable  
49 during the whole night.

50

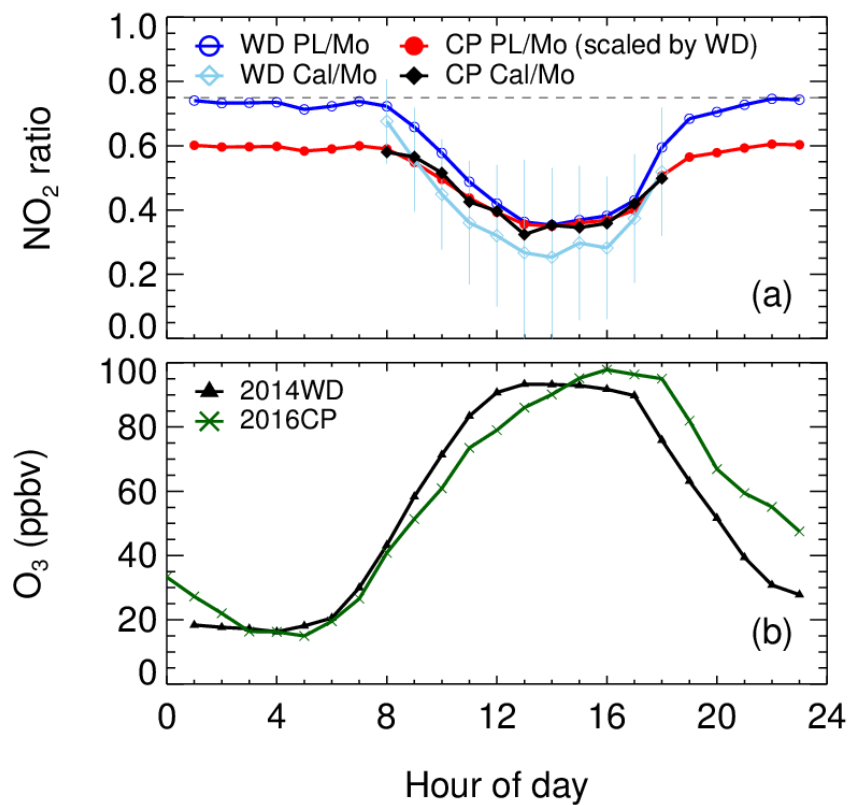

51

52 **Figure S1.** (a) The diurnal profiles of  $\text{NO}_2$  ratio of PKU-PL, Cal (calculated by photo-stationary state  
 53 method) to PKU-Mo measured in Wangdu and Changping. (b) The diurnal profile of  $\text{O}_3$  during the  
 54 Wangdu campaign and Changping campaign.

55

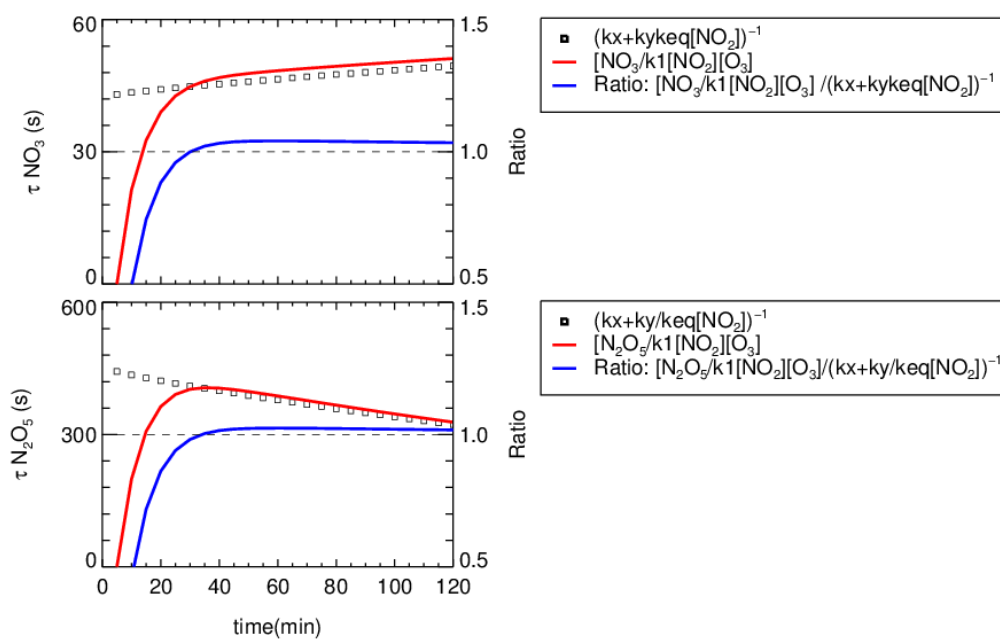

56

57 **Figure S2.** The estimated steady state time of  $\text{NO}_3$  and  $\text{N}_2\text{O}_5$  based on the box model simulation. The  
 58  $k_X$  and  $k_Y$  denotes the loss rate constants of  $\text{NO}_3$  and  $\text{N}_2\text{O}_5$ , respectively. A box model was used to  
 59 calculate the steady state lifetime of  $\text{NO}_3$  and  $\text{N}_2\text{O}_5$  after sunset during this campaign. The box model  
 60 used the chemical mechanism Regional Atmospheric Chemical Mechanism version 2 included the  
 61  $\text{N}_2\text{O}_5$  heterogeneous hydrolysis processes. The initial concentrations of  $\text{NO}_3$  and  $\text{N}_2\text{O}_5$  were set to zero.  
 62 The initial concentrations of  $\text{NO}_2$  and  $\text{O}_3$  were set to the typical values of 15 ppbv and 90 ppbv,  
 63 respectively. The model was constrained to typical VOCs reactivity toward  $\text{NO}_3$  ( $0.015 \text{ s}^{-1}$ ) and  
 64 heterogeneous uptake rate ( $0.0008 \text{ s}^{-1}$ ) in this site.

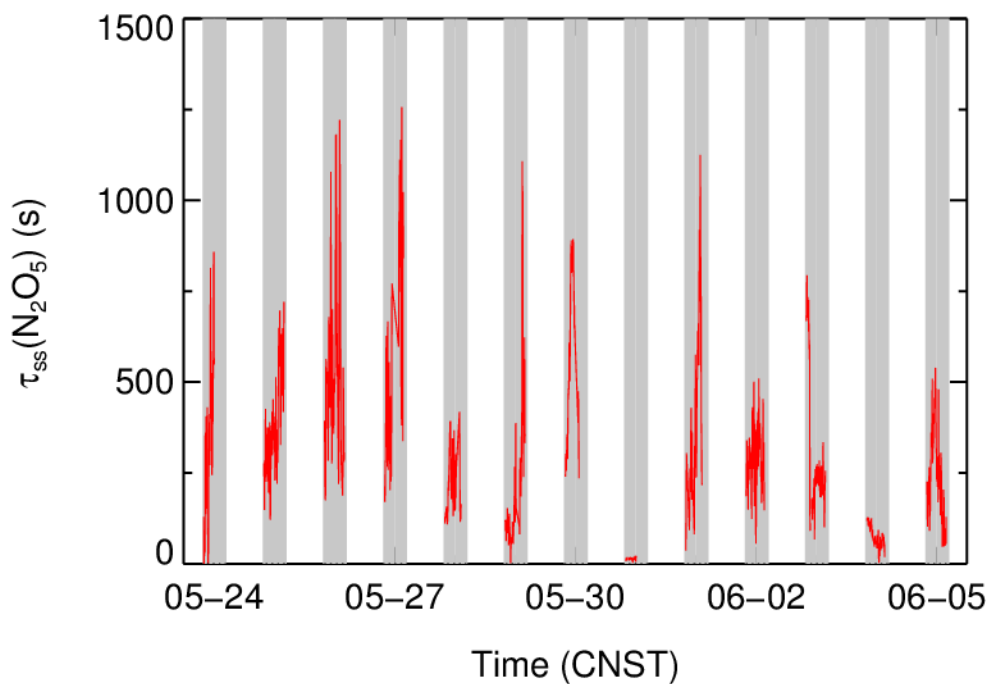

65

66

67

**Figure S3.** The time series of  $\text{N}_2\text{O}_5$  lifetime calculated by steady state method.

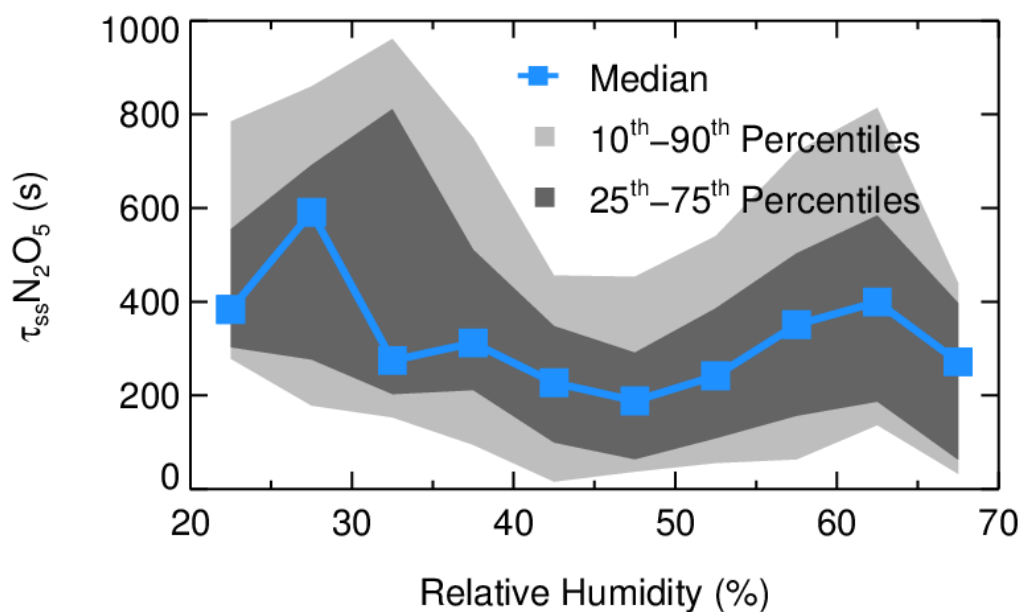

68

**Figure S4.** Dependence of  $\text{N}_2\text{O}_5$  lifetime on relative humidity, data was selected from 20:00 to 04:00. Data are shown as medians, 25-75<sup>th</sup> percentile ranges, and 10-90<sup>th</sup> percentile ranges, as shown in the legend.

72

73 **Table S1.** The statistical results of the relevant parameters in this study (19:30-05:00).

| Parameters                                              | Minimum           | Maximum | Mean | SD   |
|---------------------------------------------------------|-------------------|---------|------|------|
| RH (5min)                                               | 12%               | 76%     | 44%  | 12%  |
| Temp (5min, °C)                                         | 9.8               | 30.5    | 20.5 | 4.0  |
| NO <sub>2</sub> (5min, ppbv)                            | 0.7               | 69.2    | 14.4 | 10.1 |
| O <sub>3</sub> (5min, ppbv)                             | 0.5               | 156.1   | 40.8 | 31.2 |
| PM <sub>2.5</sub> (5min, µg m <sup>-3</sup> )           | <LOD <sup>a</sup> | 92      | 26   | 21   |
| S <sub>a</sub> (5min, µm <sup>2</sup> m <sup>-3</sup> ) | 33                | 1457    | 562  | 338  |
| N <sub>2</sub> O <sub>5</sub> (1min, pptv)              | <LOD <sup>a</sup> | 937     | 73   | 90   |
| ClNO <sub>2</sub> (1min, pptv)                          | <LOD <sup>a</sup> | 2480    | 382  | 337  |
| NO <sub>3</sub> (1min, pptv) <sup>b</sup>               | 0                 | 133     | 8    | 12   |

74 Note: <sup>a</sup> Limit of the detection; <sup>b</sup> calculated by the measured N<sub>2</sub>O<sub>5</sub>, NO<sub>2</sub> and ambient temperature.

75

76

77 **Table S2.** Lists of the observed ClNO<sub>2</sub>/N<sub>2</sub>O<sub>5</sub> (1 min average, from 19:30 to 05:00)

| Date        | Nighttime (average) |                               |                                                  | Nighttime (maximum) |                               |                                                  |
|-------------|---------------------|-------------------------------|--------------------------------------------------|---------------------|-------------------------------|--------------------------------------------------|
|             | ClNO <sub>2</sub>   | N <sub>2</sub> O <sub>5</sub> | ClNO <sub>2</sub> :N <sub>2</sub> O <sub>5</sub> | ClNO <sub>2</sub>   | N <sub>2</sub> O <sub>5</sub> | ClNO <sub>2</sub> :N <sub>2</sub> O <sub>5</sub> |
| 05/23-24    | 31                  | 14                            | 2.3                                              | 129                 | 132                           | 0.9                                              |
| 05/24-25    | 98                  | 60                            | 1.6                                              | 401                 | 255                           | 1.5                                              |
| 05/25-26    | 118                 | 89                            | 1.3                                              | 405                 | 513                           | 0.7                                              |
| 05/26-27    | 58                  | 83                            | 0.7                                              | 173                 | 272                           | 0.6                                              |
| 05/27-28    | 425                 | 56                            | 7.7                                              | 1002                | 197                           | 4.7                                              |
| 05/28-29    | 327                 | 50                            | 6.5                                              | 1428                | 466                           | 2.8                                              |
| 05/29-30    | 306                 | 134                           | 2.3                                              | 923                 | 436                           | 2.0                                              |
| 05/30-31    | 504                 | 13                            | 42.0                                             | 1243                | 132                           | 8.8                                              |
| 05/31-06/01 | 300                 | 48                            | 6.3                                              | 848                 | 230                           | 3.4                                              |
| 06/01-02    | 770                 | 106                           | 7.3                                              | 1602                | 300                           | 5.0                                              |
| 06/02-03    | 852                 | 148                           | 5.8                                              | 1425                | 937                           | 1.4                                              |
| 06/04-05    | 1172                | 129                           | 9.0                                              | 2450                | 356                           | 6.4                                              |
| Average     | 414                 | 73                            | 6.0                                              | -                   | -                             | -                                                |

78

79 **Table S3.** Lists of the daily yield of ClNO<sub>2</sub> times N<sub>2</sub>O<sub>5</sub> uptake coefficients ( $\gamma \times f$ )

| Start time                   | End time    | $\gamma \times f$ |
|------------------------------|-------------|-------------------|
| 05/23 19:00                  | 05/24 00:00 | 0.035±0.005       |
| 05/24 23:50                  | 05/25 04:00 | 0.027±0.002       |
| 05/25 19:00                  | 05/25 23:00 | 0.010±0.003       |
| 05/26 18:00                  | 05/26 21:00 | 0.008±0.004       |
| 05/27 19:00                  | 05/27 22:00 | 0.020±0.003       |
| 05/28 19:00                  | 05/28 23:00 | 0.017±0.003       |
| 05/29 19:00                  | 05/29 23:00 | 0.009±0.001       |
| 05/30 21:00                  | 05/31 03:00 | 0.030±0.005       |
| 05/31 21:00                  | 06/01 01:00 | 0.031±0.005       |
| 06/01 18:00                  | 06/02 03:00 | 0.014±0.003       |
| 06/02 18:00                  | 06/02 20:30 | 0.013±0.002       |
| 06/04 19:20                  | 06/05 00:00 | 0.016±0.002       |
| average ± standard deviation |             | 0.019±0.009       |

80
